# Supplementary material for: Influence of Electroconvection on Chronopotentiograms of an Anion-Exchange Membrane in Solutions of Weak Polybasic Acid Salts
Source: Int J Mol Sci. 2021 Dec 16;22(24):13518. doi: 10.3390/ijms222413518 (PMC8708104; doi:10.3390/ijms222413518)
Supplement: Supplementary file 1 [file ijms-22-13518-s001.zip]

Archive with 4 entries (4 files):
- Supplementary Materials.pdf
- video s1 0.02 M NaCl 4.0ilim.mp4
- video s2 0.02 M NaH2PO4  4.3ilim.mp4
- Video s3 0.02 NaHT.mp4
